# Supplementary material for: Multi-modal representation learning in retinal imaging using self-supervised learning for enhanced clinical predictions
Source: PubMed Central journal article supplement (PMC11538269; doi:10.1038/s41598-024-78515-y), 2024-11-05
Supplement: 41598_2024_78515_MOESM1_ESM.pdf [file 41598_2024_78515_MOESM1_ESM.pdf]

# Multi-Modal Representation Learning for Retinal Imaging: Leveraging Self-Supervised Learning for Enhanced Clinical Predictions

Emese Sükei<sup>1,\*</sup>, Elisabeth Rumetshofer<sup>2</sup>, Niklas Schmidinger<sup>2</sup>, Andreas Mayr<sup>2</sup>, Ursula Schmidt-Erfurth<sup>1</sup>, Günter Klambauer<sup>2</sup>, and Hrvoje Bogunović<sup>1,\*</sup>

<sup>1</sup>OPTIMA Lab, Department of Ophthalmology, Medical University of Vienna, Vienna, Austria

<sup>2</sup>LIT AI Lab, Institute for Machine Learning, Johannes Kepler University, Linz, Austria

\*{emese.suekei, hrvoje.bogunovic}@meduniwien.ac.at

## Supplementary figures

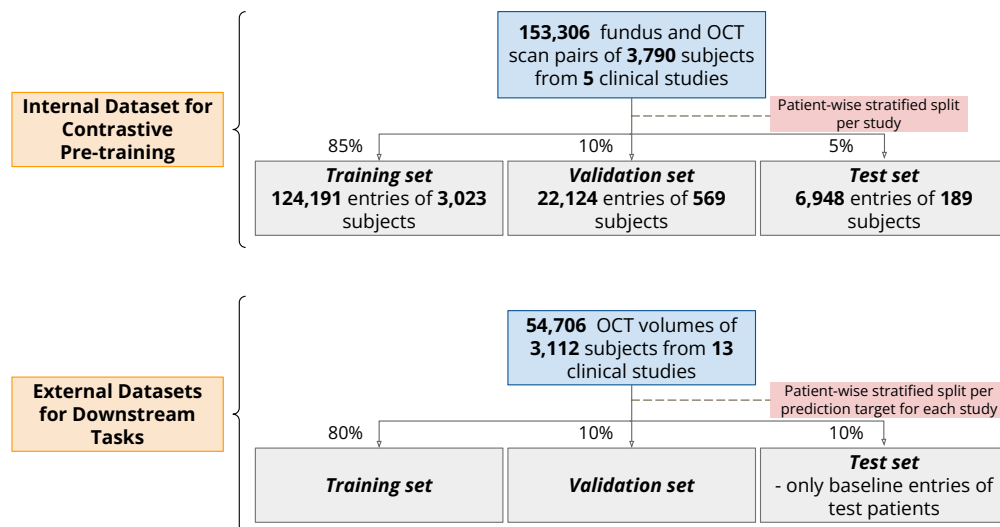

**Figure A1.** Flow chart of the data splits for the contrastive pre-training and external downstream task.

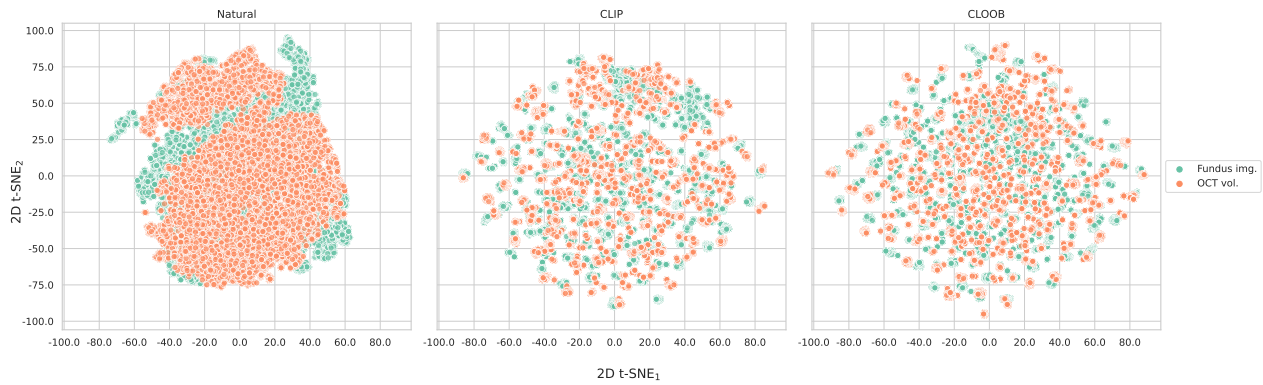

**(a)** t-SNE projections colored by imaging modality.

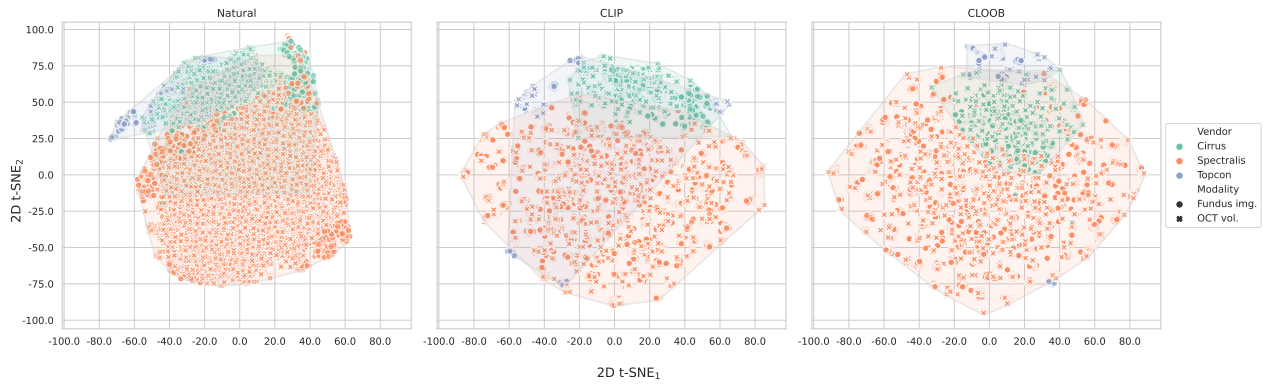

**(b)** t-SNE projections colored by imaging vendor.

**Figure A2.** Visualizations of latent representations using t-SNE projections created from the embeddings of two retinal imaging modalities in the hold-out test set. These visualizations compare embeddings obtained using natural image-based pre-trained weights with those obtained using CLIP and CLOOB contrastive weights for the 2D and 3D encoders.

## Supplementary tables

**Table A1.** Overview of the datasets used in this study.

| Variable                                             | Pre-Training | HARBOR | OLIVES  | MIX     |
|------------------------------------------------------|--------------|--------|---------|---------|
| <b>Overall dataset information</b>                   |              |        |         |         |
| <i>Patients, N</i>                                   | 3,790        | 1,094  | 96      | 1,922   |
| <i>Eyes, N</i>                                       | 7,023        | 2,183  | 96      | 1,922   |
| - Study eye                                          | 3,789        | 1,094  | 96      | 1,495   |
| - Fellow eye                                         | 3,234        | 1,089  | 0       | 427     |
| <i>Visits/patient, mean (SD)</i>                     | 16 (8)       | 24 (5) | 17 (6)  | 1 (0)   |
| <i>Scans, N</i>                                      | 153,306      | 51,186 | 1,590   | 1,929   |
| - Study eye                                          | 113,940      | 25,676 | 1,590   | 1,502   |
| - Fellow eye                                         | 39,366       | 25,510 | 0       | 427     |
| <i>Scanner used for imaging, N</i>                   |              |        |         |         |
| - Cirrus                                             | 21,776       | 51,186 | 0       | 976     |
| - Spectralis                                         | 111,407      | 0      | 1,590   | 953     |
| - Topcon                                             | 17,552       | 0      | 0       | 0       |
| - Nidek                                              | 377          | 0      | 0       | 0       |
| <b>Baseline demographic and clinical information</b> |              |        |         |         |
| <i>Gender, N</i>                                     |              |        |         |         |
| - Male                                               | 0 (n/a)      | 444    | 38      | 186     |
| - Female                                             | 0 (n/a)      | 650    | 32      | 241     |
| - Unknown/not reported                               | 3,790        | 0      | 26      | 1,495   |
| <i>Race, N</i>                                       |              |        |         |         |
| - White                                              | 0 (n/a)      | 1,058  | 36      | 745     |
| - Black or African American                          | 0 (n/a)      | 5      | 22      | 68      |
| - Asian                                              | 0 (n/a)      | 16     | 0 (n/a) | 7       |
| - Other                                              | 0 (n/a)      | 6      | 12      | 11      |
| - Unknown/not reported                               | 3,790        | 9      | 26      | 1,102   |
| <i>Age, mean (SD)</i>                                | 75 (8)       | 78 (8) | 55 (11) | 71 (11) |
| <i>Disease, N</i>                                    |              |        |         |         |
| - nAMD                                               | 3,790        | 1,094  | 0       | 0       |
| - iAMD                                               | 0            | 0      | 0       | 418     |
| - DR                                                 | 0            | 0      | 40      | 0       |
| - DME                                                | 0            | 0      | 56      | 757     |
| - GA                                                 | 0            | 0      | 0       | 170     |
| - RVO                                                | 0            | 0      | 0       | 534     |
| - Healthy                                            | 0            | 0      | 0       | 43      |

**Table A2.** Hyper-parameters used for the cross-modal contrastive pre-training.

|                 | <b>Hyper-parameter</b>                                          | <b>Value</b>                   |
|-----------------|-----------------------------------------------------------------|--------------------------------|
| Learning        | Optimizer                                                       | AdamW                          |
|                 | Learning rate                                                   | 0.005                          |
|                 | Scheduler                                                       | Cosine annealing with restarts |
|                 | Weight decay                                                    | 0.2                            |
|                 | Warm-up iterations                                              | 10000                          |
| Image encoder   | Image resolution                                                | 224x224                        |
|                 | Model                                                           | ResNet18                       |
| Volume encoder  | OCT volume resolution                                           | 224x224x20                     |
|                 | Model                                                           | VideoResNet18                  |
| Embedding space | Number of dimensions                                            | 512                            |
| InfoNCE         | $\tau^{-1}$ - initial inverse temperature parameter (learnable) | 14.3                           |
| InfoLOOB        | $\tau^{-1}$ - inverse temperature parameter (fixed)             | 30                             |
| Hopfield layers | $\beta$ - scaling parameter                                     | 14.3                           |

**Table A3.** The mean performance of the predictive models with 95% confidence intervals on external downstream tasks using *linear probing*. These evaluations were conducted on the hold-out test set through bootstrapping-based validation. The highest performance for each training setup is highlighted in bold.

(a) Regression tasks

| Dataset  | Target   | Encoder initialization | Model input                       |                                |                                |                              |                       |
|----------|----------|------------------------|-----------------------------------|--------------------------------|--------------------------------|------------------------------|-----------------------|
|          |          |                        | Fundus (2D)                       |                                | OCT (3D)                       |                              |                       |
|          |          |                        | RMSE                              | R <sup>2</sup>                 | RMSE                           | R <sup>2</sup>               |                       |
| HARBOR   | BCVA     | Natural                | 20.167 (18.395, 21.843)           | -0.011 (-0.126, 0.082)         | 16.848 (15.469, 18.294)        | 0.294 (0.203, 0.373)         |                       |
|          |          | SimCLR                 | 20.240 (18.489, 21.893)           | -0.018 (-0.139, 0.079)         | 16.776 (15.344, 18.176)        | 0.300 (0.195, 0.390)         |                       |
|          |          | BYOL                   | 20.295 (18.558, 21.886)           | -0.024 (-0.123, 0.062)         | 19.091 (17.394, 20.671)        | 0.094 (0.003, 0.171)         |                       |
|          |          | VICReg                 | 20.552 (18.731, 22.233)           | -0.050 (-0.163, 0.046)         | 17.026 (15.549, 18.502)        | 0.279 (0.186, 0.360)         |                       |
|          |          | CLIP                   | <b>16.688 (15.252, 18.110)</b>    | <b>0.308 (0.171, 0.415)</b>    | <b>14.715 (13.415, 15.957)</b> | <b>0.462 (0.362, 0.545)</b>  |                       |
|          |          | CLOOB                  | 16.914 (15.506, 18.275)           | 0.289 (0.166, 0.394)           | 16.814 (15.504, 18.118)        | 0.297 (0.144, 0.417)         |                       |
|          | CST [μm] | Natural                | 129.552 (115.325, 143.722)        | -0.428 (-0.554, -0.320)        | 107.613 (96.384, 118.832)      | 0.015 (-0.083, 0.107)        |                       |
|          |          | SimCLR                 | 128.594 (114.808, 142.596)        | -0.407 (-0.531, -0.298)        | 108.687 (97.101, 120.399)      | -0.005 (-0.117, 0.096)       |                       |
|          |          | BYOL                   | 127.265 (112.782, 141.794)        | -0.378 (-0.503, -0.270)        | 127.743 (113.303, 142.212)     | -0.388 (-0.497, -0.293)      |                       |
|          |          | VICReg                 | 123.926 (109.984, 137.848)        | -0.306 (-0.420, -0.207)        | 113.371 (101.325, 125.538)     | -0.094 (-0.211, 0.010)       |                       |
|          |          | CLIP                   | 120.337 (107.494, 133.509)        | -0.232 (-0.351, -0.135)        | 91.724 (81.937, 101.910)       | 0.284 (0.208, 0.351)         |                       |
|          |          | CLOOB                  | <b>116.597 (104.048, 129.646)</b> | <b>-0.157 (-0.283, -0.055)</b> | <b>81.800 (73.921, 89.474)</b> | <b>0.431 (0.348, 0.497)</b>  |                       |
|          | OLIVES   | BCVA                   | Natural                           | 15.238 (11.127, 18.631)        | -1.360 (-4.330, -0.236)        | 8.016 (5.783, 9.925)         | 0.347 (-0.386, 0.579) |
|          |          |                        | SimCLR                            | 11.383 (6.562, 15.500)         | -0.317 (-1.788, 0.420)         | 9.042 (5.884, 11.640)        | 0.169 (-0.266, 0.373) |
| BYOL     |          |                        | <b>9.804 (5.612, 13.449)</b>      | <b>0.023 (-0.865, 0.471)</b>   | 8.178 (5.717, 10.335)          | 0.320 (-0.020, 0.438)        |                       |
| VICReg   |          |                        | 10.648 (6.851, 13.993)            | -0.152 (-1.293, 0.366)         | 8.182 (4.886, 11.197)          | 0.320 (-0.244, 0.587)        |                       |
| CLIP     |          |                        | 13.010 (9.179, 16.500)            | -0.720 (-3.320, 0.159)         | 9.956 (7.062, 12.657)          | -0.007 (-2.117, 0.605)       |                       |
| CLOOB    |          |                        | 11.116 (6.685, 14.904)            | -0.256 (-1.727, 0.439)         | <b>7.910 (6.052, 9.516)</b>    | <b>0.364 (-0.532, 0.628)</b> |                       |
| CST [μm] |          | Natural                | 152.908 (107.051, 193.098)        | -0.095 (-0.866, 0.276)         | 128.607 (78.947, 172.238)      | 0.226 (-0.305, 0.526)        |                       |
|          |          | SimCLR                 | 202.449 (127.550, 264.305)        | -0.919 (-2.118, -0.078)        | 132.526 (84.129, 173.050)      | 0.178 (-0.248, 0.444)        |                       |
|          |          | BYOL                   | 169.763 (110.201, 220.100)        | -0.349 (-1.152, 0.061)         | 130.553 (73.208, 175.565)      | 0.202 (-0.328, 0.558)        |                       |
|          |          | VICReg                 | 158.861 (104.134, 204.929)        | -0.182 (-0.851, 0.118)         | 131.744 (84.352, 171.721)      | 0.187 (-0.355, 0.478)        |                       |
|          |          | CLIP                   | <b>123.492 (78.700, 160.497)</b>  | <b>0.286 (-0.200, 0.598)</b>   | 80.782 (54.066, 103.429)       | 0.694 (0.553, 0.787)         |                       |
|          |          | CLOOB                  | 150.215 (105.563, 187.405)        | -0.056 (-0.895, 0.322)         | <b>53.995 (35.282, 73.430)</b> | <b>0.864 (0.748, 0.930)</b>  |                       |

(b) Classification and forecasting tasks

| Dataset | Target        | Encoder initialization | Model input                 |                             |                             |                             |
|---------|---------------|------------------------|-----------------------------|-----------------------------|-----------------------------|-----------------------------|
|         |               |                        | Fundus (2D)                 |                             | OCT (3D)                    |                             |
|         |               |                        | AUROC                       | AP                          | AUROC                       | AP                          |
| HARBOR  | Fluid present | Natural                | 0.574 (0.503, 0.646)        | 0.873 (0.832, 0.912)        | 0.713 (0.652, 0.775)        | 0.921 (0.891, 0.948)        |
|         |               | SimCLR                 | 0.545 (0.460, 0.623)        | 0.842 (0.789, 0.890)        | 0.782 (0.724, 0.832)        | 0.942 (0.917, 0.963)        |
|         |               | BYOL                   | 0.588 (0.512, 0.665)        | 0.862 (0.814, 0.905)        | 0.574 (0.492, 0.648)        | 0.834 (0.778, 0.889)        |
|         |               | VICReg                 | 0.544 (0.460, 0.622)        | 0.844 (0.794, 0.893)        | 0.717 (0.654, 0.783)        | 0.920 (0.889, 0.948)        |
|         |               | CLIP                   | 0.775 (0.722, 0.827)        | 0.944 (0.924, 0.963)        | <b>0.871 (0.833, 0.907)</b> | <b>0.971 (0.959, 0.981)</b> |
|         |               | CLOOB                  | <b>0.776 (0.715, 0.833)</b> | <b>0.939 (0.913, 0.962)</b> | 0.804 (0.745, 0.854)        | 0.943 (0.913, 0.967)        |
|         | High TR       | Natural                | 0.528 (0.409, 0.650)        | 0.209 (0.118, 0.374)        | 0.596 (0.469, 0.726)        | 0.292 (0.178, 0.484)        |
|         |               | SimCLR                 | 0.565 (0.453, 0.676)        | 0.185 (0.121, 0.309)        | 0.550 (0.412, 0.680)        | 0.216 (0.125, 0.385)        |
|         |               | BYOL                   | 0.597 (0.457, 0.734)        | 0.234 (0.139, 0.410)        | 0.591 (0.466, 0.719)        | 0.221 (0.137, 0.379)        |
|         |               | VICReg                 | 0.487 (0.352, 0.623)        | 0.170 (0.103, 0.294)        | 0.591 (0.464, 0.711)        | 0.224 (0.135, 0.393)        |
|         |               | CLIP                   | <b>0.633 (0.507, 0.755)</b> | <b>0.259 (0.154, 0.441)</b> | 0.709 (0.564, 0.832)        | 0.429 (0.253, 0.647)        |
|         |               | CLOOB                  | 0.622 (0.502, 0.743)        | 0.285 (0.177, 0.469)        | <b>0.755 (0.652, 0.846)</b> | <b>0.323 (0.205, 0.512)</b> |
|         | GA Conv.      | Natural                | 0.539 (0.392, 0.690)        | 0.238 (0.115, 0.444)        | 0.467 (0.342, 0.600)        | 0.136 (0.081, 0.282)        |
|         |               | SimCLR                 | 0.448 (0.317, 0.591)        | 0.138 (0.075, 0.282)        | 0.607 (0.482, 0.717)        | 0.164 (0.098, 0.301)        |
|         |               | BYOL                   | 0.510 (0.373, 0.646)        | 0.138 (0.084, 0.250)        | 0.468 (0.335, 0.604)        | 0.117 (0.072, 0.207)        |
|         |               | VICReg                 | 0.589 (0.448, 0.720)        | 0.175 (0.106, 0.308)        | 0.524 (0.397, 0.647)        | 0.132 (0.083, 0.242)        |
|         |               | CLIP                   | 0.537 (0.408, 0.660)        | 0.182 (0.091, 0.326)        | <b>0.665 (0.533, 0.795)</b> | <b>0.238 (0.132, 0.432)</b> |
|         |               | CLOOB                  | <b>0.555 (0.431, 0.684)</b> | <b>0.207 (0.100, 0.377)</b> | 0.648 (0.509, 0.773)        | 0.200 (0.119, 0.369)        |
|         | CNV Conv.     | Natural                | 0.524 (0.422, 0.621)        | 0.174 (0.119, 0.270)        | 0.591 (0.474, 0.702)        | 0.233 (0.145, 0.385)        |
|         |               | SimCLR                 | 0.565 (0.463, 0.666)        | 0.195 (0.133, 0.307)        | 0.513 (0.413, 0.614)        | 0.177 (0.118, 0.287)        |
|         |               | BYOL                   | 0.528 (0.421, 0.640)        | 0.191 (0.127, 0.312)        | 0.522 (0.405, 0.634)        | 0.192 (0.128, 0.306)        |
|         |               | VICReg                 | 0.545 (0.432, 0.659)        | 0.200 (0.130, 0.319)        | 0.461 (0.360, 0.561)        | 0.156 (0.109, 0.238)        |
|         |               | CLIP                   | <b>0.581 (0.462, 0.696)</b> | <b>0.279 (0.165, 0.439)</b> | 0.605 (0.495, 0.714)        | 0.239 (0.158, 0.392)        |
|         |               | CLOOB                  | 0.560 (0.438, 0.679)        | 0.262 (0.154, 0.424)        | <b>0.674 (0.585, 0.764)</b> | <b>0.247 (0.168, 0.379)</b> |
| OLIVES  | DME/DR        | Natural                | 0.700 (0.389, 0.944)        | 0.519 (0.226, 0.929)        | 0.640 (0.166, 1.0)          | 0.689 (0.187, 1.0)          |
|         |               | SimCLR                 | 0.700 (0.320, 1.0)          | 0.655 (0.236, 1.0)          | 0.600 (0.273, 0.907)        | 0.446 (0.194, 0.886)        |
|         |               | BYOL                   | 0.860 (0.593, 1.0)          | 0.789 (0.375, 1.0)          | 0.820 (0.538, 1.0)          | 0.739 (0.298, 1.0)          |
|         |               | VICReg                 | 0.740 (0.417, 1.0)          | 0.572 (0.250, 1.0)          | 0.620 (0.280, 0.923)        | 0.463 (0.200, 0.900)        |
|         |               | CLIP                   | 0.740 (0.428, 0.962)        | 0.544 (0.250, 0.952)        | 0.880 (0.667, 1.0)          | 0.768 (0.392, 1.0)          |
|         |               | CLOOB                  | <b>0.940 (0.769, 1.0)</b>   | <b>0.925 (0.667, 1.0)</b>   | <b>0.940 (0.769, 1.0)</b>   | <b>0.877 (0.533, 1.0)</b>   |
| MIX     | Disease type  | Natural                | 0.875 (0.853, 0.895)        | 0.667 (0.610, 0.716)        | 0.928 (0.912, 0.941)        | 0.773 (0.726, 0.816)        |
|         |               | SimCLR                 | 0.617 (0.581, 0.654)        | 0.270 (0.237, 0.311)        | 0.946 (0.934, 0.957)        | 0.837 (0.800, 0.871)        |
|         |               | BYOL                   | 0.863 (0.841, 0.882)        | 0.606 (0.548, 0.660)        | 0.861 (0.839, 0.881)        | 0.598 (0.541, 0.654)        |
|         |               | VICReg                 | 0.868 (0.847, 0.886)        | 0.619 (0.558, 0.672)        | 0.925 (0.908, 0.940)        | 0.787 (0.740, 0.824)        |
|         |               | CLIP                   | <b>0.929 (0.913, 0.942)</b> | 0.789 (0.744, 0.828)        | <b>0.982 (0.977, 0.987)</b> | <b>0.940 (0.921, 0.957)</b> |
|         |               | CLOOB                  | 0.928 (0.913, 0.943)        | <b>0.791 (0.745, 0.830)</b> | 0.978 (0.971, 0.983)        | 0.924 (0.901, 0.944)        |

**Table A4.** The mean performance of the predictive models with 95% confidence intervals on external downstream tasks using *fine-tuning*. These evaluations were conducted on the hold-out test set through bootstrapping-based validation. The highest performance for each training setup is highlighted in bold.

(a) Regression tasks

| Dataset        | Target | Encoder initialization           | Model input                       |                                |                                |                             |                       |                      |
|----------------|--------|----------------------------------|-----------------------------------|--------------------------------|--------------------------------|-----------------------------|-----------------------|----------------------|
|                |        |                                  | Fundus (2D)                       |                                | OCT (3D)                       |                             |                       |                      |
|                |        |                                  | RMSE                              | R <sup>2</sup>                 | RMSE                           | R <sup>2</sup>              |                       |                      |
| HARBOR         | BCVA   | Random                           | 21.765 (20.071,23.347)            | -0.177 (-0.348, -0.033)        | 12.098 (10.727, 13.445)        | 0.636 (0.547, 0.709)        |                       |                      |
|                |        | Natural                          | 17.221 (15.684, 18.587)           | 0.263 (0.133, 0.374)           | 11.689 (10.538, 12.751)        | 0.660 (0.584, 0.721)        |                       |                      |
|                |        | SimCLR                           | 16.628 (15.101, 18.046)           | 0.313 (0.183, 0.423)           | <b>11.512 (10.142, 12.804)</b> | <b>0.670 (0.585, 0.740)</b> |                       |                      |
|                |        | BYOL                             | 17.355 (15.770, 18.897)           | 0.251 (0.112, 0.369)           | 12.408 (11.185, 13.604)        | 0.617 (0.539, 0.685)        |                       |                      |
|                |        | VICReg                           | 17.337 (15.807, 18.839)           | 0.253 (0.109, 0.365)           | 13.307 (11.865, 14.611)        | 0.560 (0.457, 0.651)        |                       |                      |
|                |        | CLIP                             | <b>16.310 (14.949, 17.697)</b>    | <b>0.339 (0.208, 0.449)</b>    | 12.323 (11.108, 13.442)        | 0.622 (0.545, 0.691)        |                       |                      |
|                |        | CLOOB                            | 16.423 (14.973, 17.834)           | 0.329 (0.192, 0.443)           | 12.218 (11.006, 13.377)        | 0.629 (0.539, 0.699)        |                       |                      |
|                |        | CST [ $\mu$ m]                   | Random                            | 161.234 (147.385, 175.923)     | -1.211 (-1.589, -0.911)        | 85.020 (76.070, 93.343)     | 0.384 (0.292, 0.464)  |                      |
|                |        |                                  | Natural                           | 125.638 (112.945, 138.954)     | -0.343 (-0.499, -0.209)        | 74.160 (66.118, 81.705)     | 0.532 (0.430, 0.612)  |                      |
|                | SimCLR |                                  | 131.279 (116.946, 145.467)        | -0.466 (-0.613, -0.344)        | 78.870 (70.879, 86.749)        | 0.470 (0.378, 0.550)        |                       |                      |
|                | BYOL   |                                  | 129.915 (115.821, 144.250)        | -0.436 (-0.576, -0.315)        | 80.323 (59.472, 107.030)       | 0.451 (-0.013, 0.702)       |                       |                      |
|                | VICReg |                                  | 129.567 (116.441, 142.717)        | -0.428 (-0.596, -0.277)        | 73.131 (64.730, 81.672)        | 0.545 (0.447, 0.622)        |                       |                      |
|                | CLIP   |                                  | <b>112.938 (100.536, 125.803)</b> | <b>-0.085 (-0.176, -0.005)</b> | 64.870 (52.061, 81.038)        | 0.642 (0.422, 0.777)        |                       |                      |
|                | CLOOB  |                                  | 122.770 (108.843, 136.728)        | -0.282 (-0.385, -0.195)        | <b>64.298 (51.620, 80.412)</b> | <b>0.648 (0.427, 0.776)</b> |                       |                      |
|                | OLIVES |                                  | BCVA                              | Random                         | 14.985 (8.814, 21.010)         | -1.282 (-4.214, 0.072)      | 7.224 (4.479, 9.480)  | 0.470 (0.056, 0.673) |
|                |        |                                  |                                   | Natural                        | 9.858 (6.901, 12.582)          | 0.012 (-1.078, 0.429)       | 6.851 (3.700, 9.493)  | 0.523 (0.018, 0.802) |
|                |        | SimCLR                           |                                   | 9.236 (5.761, 12.083)          | 0.133 (-0.416, 0.418)          | 7.159 (4.596, 9.728)        | 0.479 (-0.154, 0.746) |                      |
|                |        | BYOL                             |                                   | 10.851 (6.946, 14.309)         | -0.197 (-1.224, 0.298)         | 8.551 (5.333, 11.713)       | 0.257 (-0.661, 0.676) |                      |
| VICReg         |        | 9.145 (6.325, 11.624)            |                                   | 0.150 (-0.740, 0.480)          | 7.111 (4.146, 10.087)          | 0.486 (-0.185, 0.783)       |                       |                      |
| CLIP           |        | 9.347 (5.911, 12.387)            |                                   | 0.112 (-0.574, 0.412)          | 5.831 (3.000, 8.051)           | 0.654 (0.029, 0.909)        |                       |                      |
| CLOOB          |        | <b>7.454 (5.250, 9.500)</b>      |                                   | <b>0.435 (-0.027, 0.622)</b>   | <b>5.601 (3.373, 7.467)</b>    | <b>0.681 (0.306, 0.856)</b> |                       |                      |
| CST [ $\mu$ m] |        | Random                           |                                   | 238.450 (166.010, 299.520)     | -1.662 (-3.328, -0.982)        | 86.648 (50.785, 118.532)    | 0.648 (0.389, 0.808)  |                      |
|                |        | Natural                          |                                   | 135.106 (94.991, 170.290)      | 0.145 (-0.376, 0.385)          | 77.561 (45.622, 104.604)    | 0.718 (0.514, 0.854)  |                      |
|                | SimCLR | 161.251 (103.507, 208.809)       | -0.217 (-1.009, 0.186)            | 39.625 (24.143, 53.056)        | 0.926 (0.823, 0.972)           |                             |                       |                      |
|                | BYOL   | 175.295 (111.847, 227.131)       | -0.439 (-1.317, -0.023)           | 61.765 (37.794, 81.894)        | 0.821 (0.701, 0.902)           |                             |                       |                      |
|                | VICReg | 174.455 (104.595, 232.826)       | -0.425 (-1.367, 0.113)            | 51.114 (33.464, 66.857)        | 0.878 (0.778, 0.935)           |                             |                       |                      |
|                | CLIP   | 122.149 (76.378, 160.604)        | 0.301 (-0.150, 0.553)             | 29.099 (22.088, 34.847)        | 0.960 (0.924, 0.976)           |                             |                       |                      |
|                | CLOOB  | <b>110.547 (75.461, 139.629)</b> | <b>0.428 (0.091, 0.590)</b>       | <b>28.106 (19.962, 35.386)</b> | <b>0.963 (0.916, 0.982)</b>    |                             |                       |                      |

(b) Classification and forecasting tasks

| Dataset | Target                      | Encoder initialization | Model input                 |                             |                             |                             |                      |                      |
|---------|-----------------------------|------------------------|-----------------------------|-----------------------------|-----------------------------|-----------------------------|----------------------|----------------------|
|         |                             |                        | Fundus (2D)                 |                             | OCT (3D)                    |                             |                      |                      |
|         |                             |                        | AUROC                       | AP                          | AUROC                       | AP                          |                      |                      |
| HARBOR  | Fluid present               | Random                 | 0.580 (0.507, 0.652)        | 0.871 (0.827, 0.912)        | 0.906 (0.870, 0.936)        | 0.977 (0.966, 0.987)        |                      |                      |
|         |                             | Natural                | 0.720 (0.646, 0.791)        | 0.890 (0.846, 0.939)        | 0.900 (0.869, 0.931)        | 0.978 (0.969, 0.986)        |                      |                      |
|         |                             | SimCLR                 | 0.667 (0.600, 0.736)        | 0.903 (0.869, 0.935)        | 0.918 (0.890, 0.944)        | 0.982 (0.974, 0.989)        |                      |                      |
|         |                             | BYOL                   | 0.709 (0.639, 0.775)        | 0.909 (0.870, 0.943)        | 0.910 (0.880, 0.938)        | 0.980 (0.971, 0.987)        |                      |                      |
|         |                             | VICReg                 | 0.616 (0.542, 0.693)        | 0.867 (0.819, 0.914)        | 0.896 (0.863, 0.926)        | 0.977 (0.967, 0.985)        |                      |                      |
|         |                             | CLIP                   | <b>0.805 (0.753, 0.856)</b> | <b>0.951 (0.931, 0.969)</b> | <b>0.930 (0.903, 0.953)</b> | <b>0.985 (0.978, 0.991)</b> |                      |                      |
|         |                             | CLOOB                  | 0.775 (0.720, 0.829)        | 0.941 (0.919, 0.962)        | 0.915 (0.886, 0.940)        | 0.982 (0.974, 0.989)        |                      |                      |
|         |                             | High TR                | Random                      | 0.529 (0.389, 0.672)        | 0.227 (0.130, 0.421)        | 0.546 (0.430, 0.668)        | 0.223 (0.141, 0.391) |                      |
|         |                             |                        | Natural                     | 0.542 (0.412, 0.669)        | 0.191 (0.117, 0.336)        | 0.526 (0.394, 0.645)        | 0.175 (0.112, 0.297) |                      |
|         | SimCLR                      |                        | 0.293 (0.183, 0.411)        | 0.116 (0.076, 0.187)        | 0.626 (0.498, 0.746)        | 0.265 (0.168, 0.427)        |                      |                      |
|         | BYOL                        |                        | 0.441 (0.312, 0.586)        | 0.151 (0.098, 0.237)        | 0.583 (0.457, 0.700)        | 0.237 (0.149, 0.399)        |                      |                      |
|         | VICReg                      |                        | 0.503 (0.373, 0.632)        | 0.174 (0.111, 0.309)        | 0.509 (0.368, 0.654)        | 0.222 (0.127, 0.398)        |                      |                      |
|         | CLIP                        |                        | <b>0.660 (0.527, 0.783)</b> | <b>0.344 (0.191, 0.534)</b> | <b>0.796 (0.683, 0.887)</b> | <b>0.435 (0.282, 0.664)</b> |                      |                      |
|         | CLOOB                       |                        | 0.553 (0.419, 0.699)        | 0.231 (0.139, 0.422)        | 0.762 (0.659, 0.856)        | 0.398 (0.236, 0.597)        |                      |                      |
|         | GA Conv.                    |                        | Random                      | 0.619 (0.497, 0.736)        | 0.173 (0.103, 0.313)        | 0.565 (0.424, 0.701)        | 0.161 (0.094, 0.307) |                      |
|         |                             |                        | Natural                     | 0.602 (0.430, 0.758)        | 0.237 (0.121, 0.447)        | 0.568 (0.447, 0.695)        | 0.171 (0.099, 0.329) |                      |
|         |                             | SimCLR                 | 0.566 (0.443, 0.693)        | 0.149 (0.090, 0.272)        | 0.568 (0.459, 0.685)        | 0.160 (0.096, 0.308)        |                      |                      |
|         |                             | BYOL                   | 0.565 (0.426, 0.706)        | 0.171 (0.099, 0.333)        | 0.527 (0.394, 0.660)        | 0.135 (0.082, 0.243)        |                      |                      |
|         |                             | VICReg                 | 0.563 (0.428, 0.693)        | 0.157 (0.092, 0.290)        | 0.519 (0.376, 0.672)        | 0.148 (0.090, 0.271)        |                      |                      |
|         |                             | CLIP                   | <b>0.636 (0.522, 0.745)</b> | <b>0.182 (0.106, 0.321)</b> | <b>0.701 (0.593, 0.802)</b> | <b>0.224 (0.135, 0.404)</b> |                      |                      |
|         |                             | CLOOB                  | 0.632 (0.494, 0.752)        | 0.199 (0.110, 0.367)        | 0.693 (0.586, 0.797)        | 0.210 (0.130, 0.369)        |                      |                      |
|         |                             | CNV Conv.              | Random                      | 0.526 (0.419, 0.630)        | 0.179 (0.122, 0.276)        | 0.614 (0.506, 0.721)        | 0.266 (0.158, 0.420) |                      |
|         |                             |                        | Natural                     | 0.492 (0.387, 0.596)        | 0.175 (0.116, 0.288)        | 0.626 (0.524, 0.725)        | 0.239 (0.159, 0.384) |                      |
|         | SimCLR                      |                        | 0.419 (0.304, 0.536)        | 0.160 (0.105, 0.264)        | 0.565 (0.451, 0.678)        | 0.213 (0.137, 0.349)        |                      |                      |
|         | BYOL                        |                        | 0.534 (0.425, 0.644)        | 0.192 (0.130, 0.309)        | 0.540 (0.430, 0.654)        | 0.293 (0.166, 0.436)        |                      |                      |
|         | VICReg                      |                        | 0.478 (0.362, 0.603)        | 0.184 (0.121, 0.304)        | 0.559 (0.440, 0.676)        | 0.206 (0.133, 0.325)        |                      |                      |
|         | CLIP                        |                        | 0.575 (0.470, 0.683)        | 0.200 (0.135, 0.306)        | 0.647 (0.541, 0.751)        | 0.280 (0.175, 0.429)        |                      |                      |
| CLOOB   | <b>0.621 (0.521, 0.725)</b> |                        | <b>0.236 (0.157, 0.377)</b> | <b>0.698 (0.595, 0.793)</b> | <b>0.299 (0.202, 0.463)</b> |                             |                      |                      |
| OLIVES  | DME/DR                      |                        | Random                      | 0.640 (0.240, 1.0)          | 0.627 (0.201, 1.0)          | 0.920 (0.714, 1.0)          | 0.885 (0.583, 1.0)   |                      |
|         |                             |                        | Natural                     | 0.680 (0.340, 0.955)        | 0.578 (0.208, 0.957)        | 0.900 (0.630, 1.0)          | 0.900 (0.591, 1.0)   |                      |
|         |                             | SimCLR                 | 0.620 (0.231, 0.944)        | 0.570 (0.188, 0.933)        | 0.920 (0.727, 1.0)          | 0.876 (0.500, 1.0)          |                      |                      |
|         |                             | BYOL                   | 0.360 (0.077, 0.680)        | 0.306 (0.133, 0.649)        | 0.880 (0.636, 1.0)          | 0.796 (0.352, 1.0)          |                      |                      |
|         |                             | VICReg                 | 0.360 (0.091, 0.679)        | 0.302 (0.140, 0.617)        | 0.720 (0.432, 0.964)        | 0.505 (0.242, 0.964)        |                      |                      |
|         |                             | CLIP                   | 0.840 (0.577, 1.0)          | 0.743 (0.361, 1.0)          | 0.980 (0.889, 1.0)          | 0.967 (0.833, 1.0)          |                      |                      |
|         |                             | CLOOB                  | <b>0.960 (0.833, 1.0)</b>   | <b>0.943 (0.733, 1.0)</b>   | <b>1.0 (1.0, 1.0)</b>       | <b>1.0 (0.999, 1.0)</b>     |                      |                      |
|         |                             | MIX                    | Disease type                | Random                      | 0.881 (0.861, 0.899)        | 0.655 (0.600, 0.709)        | 0.966 (0.956, 0.975) | 0.899 (0.872, 0.924) |
|         |                             |                        |                             | Natural                     | 0.925 (0.907, 0.941)        | 0.796 (0.754, 0.835)        | 0.986 (0.980, 0.990) | 0.954 (0.937, 0.968) |
| SimCLR  | 0.918 (0.899, 0.932)        |                        |                             | 0.747 (0.695, 0.793)        | 0.987 (0.981, 0.992)        | 0.958 (0.942, 0.973)        |                      |                      |
| BYOL    | 0.890 (0.870, 0.909)        |                        |                             | 0.675 (0.617, 0.727)        | 0.991 (0.987, 0.994)        | 0.969 (0.957, 0.980)        |                      |                      |
| VICReg  | 0.892 (0.873, 0.909)        |                        |                             | 0.691 (0.637, 0.737)        | 0.989 (0.983, 0.993)        | 0.964 (0.949, 0.976)        |                      |                      |
| CLIP    | 0.950 (0.937, 0.960)        |                        |                             | 0.845 (0.807, 0.878)        | 0.993 (0.990, 0.995)        | 0.973 (0.962, 0.982)        |                      |                      |
| CLOOB   | <b>0.960 (0.949, 0.969)</b> |                        |                             | <b>0.878 (0.845, 0.905)</b> | <b>0.995 (0.993, 0.997)</b> | <b>0.982 (0.973, 0.989)</b> |                      |                      |
